# Supplementary material
Source: ML conference proceedings conference paper supplement (https://aclanthology.org/2026.semeval-1.61)

**Input Code**

**TF-IDF**

**Stylometric Features**

**Feature Concatenation**

*[TF-IDF + Stylometric Features]*

*[TF-IDF] OR [TF-IDF + Stylometric Features]*

**Machine Learning Classifiers**

*[Logistic Regression, SVM, KNN etc]*

**Binary Prediction**

*[Human, Machine]*

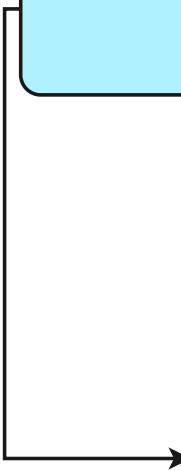

Supplement: SupplementaryMaterial [file machine_learning_pipe_line.pdf › figures/machine_learning_pipe_line.pdf]
