# Supplementary material
Source: ML conference proceedings conference paper supplement (https://aclanthology.org/2026.semeval-1.61)
Supplement: SupplementaryMaterial [file transformer_pipeline.pdf › figures/transformer_pipeline.pdf]

**Input Code**



```
graph TD; A[Input Code] --> B[Tokenization]; B --> C[Transformer Encoder  
[BERT, CodeBert, UniXcoder]]; C --> D[Low-Rank Adapter]; D --> E[Binary Prediction  
[Human, Machine]]
```

The diagram illustrates a sequential process for analyzing input code. It begins with a blue box labeled 'Input Code', which points down to an orange box labeled 'Tokenization'. This leads to a dashed pink box containing a blue box labeled 'Transformer Encoder' with the text '[BERT, CodeBert, UniXcoder]' below it, and a label 'Low-Rank Adapter' centered below the blue box. Finally, an arrow points down to a teal box labeled 'Binary Prediction' with the text '[Human, Machine]' below it.

**Tokenization**

**Transformer Encoder**

*[BERT, CodeBert, UniXcoder]*

**Low-Rank Adapter**

**Binary Prediction**

*[Human, Machine]*
