# Supplementary material
Source: ML conference proceedings conference paper supplement (https://aclanthology.org/2026.semeval-1.61)

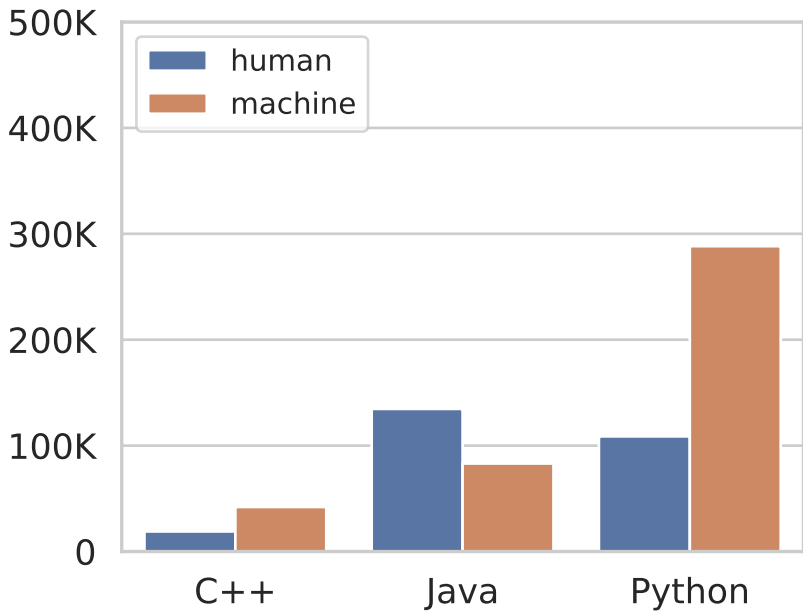

Supplement: SupplementaryMaterial [file camel_usage_per_language.pdf › figures/camel_usage_per_language.pdf]

$10^1$

$10^0$

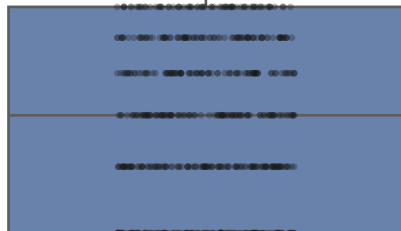

Human

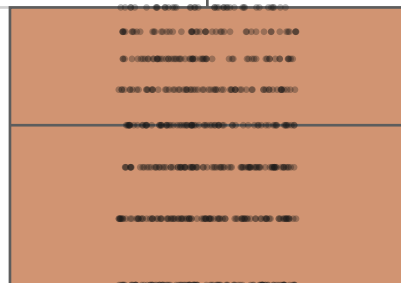

Machine

Supplement: SupplementaryMaterial [file complexity_score.pdf › figures/complexity_score.pdf]

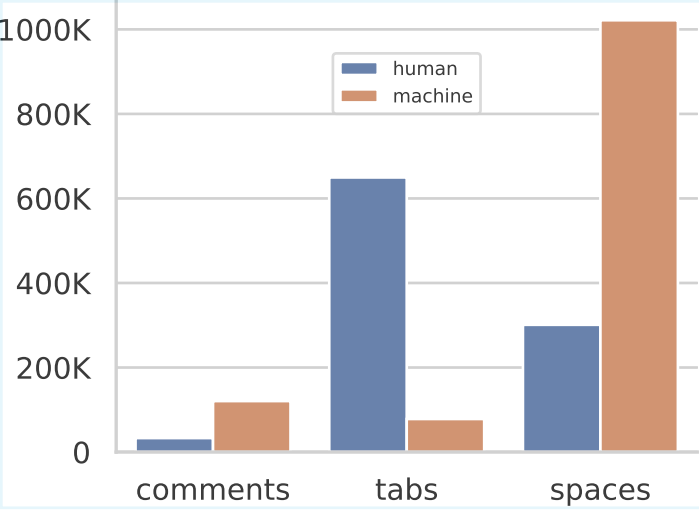

Supplement: SupplementaryMaterial [file feature_counts_by_label.pdf › figures/feature_counts_by_label.pdf]

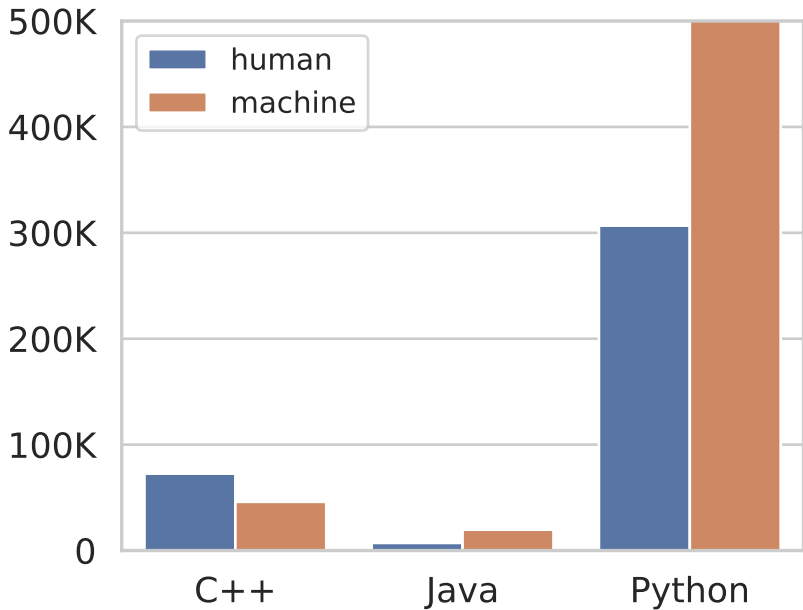

Supplement: SupplementaryMaterial [file snake_usage_per_language.pdf › figures/snake_usage_per_language.pdf]
